# Supplementary material for: Multi-Omics-Based Functional Characterization of Hybrid Fermented Broussonetia papyrifera: A Preliminary Study on Gut Health of Laying Hens
Source: MDPI journal article supplement (doi:10.3390/fermentation8100547), 2022-10-16
Supplement: s1 [file s1]

# Supplementary information

**Table S1.** Effects of yeast by-product supplementation on proximate composition of the sterile solid-state Lp-fermented *B. papyrifera*.

| YB (%) | IT (day) | DM, %    | NDF,%DM                | CP,%DM   | CF,%DM                | Ash, %DM | GE, kJ   |
|--------|----------|----------|------------------------|----------|-----------------------|----------|----------|
| 0      | 0        | 44.1±3.0 | 35.3±2.0 <sup>c</sup>  | 17.8±1.0 | 10.5±1.0 <sup>a</sup> | 18.8±3.6 | 16.7±0.9 |
|        | 4        | 46.2±0.3 | 33.4±0.8 <sup>bc</sup> | 18.4±0.1 | 12.8±1.4 <sup>b</sup> | 21.0±2.2 | 17.2±0.3 |
|        | 7        | 46.1±0.6 | 33.1±1.2 <sup>ab</sup> | 18.5±0.1 | 11.2±0.1 <sup>a</sup> | 16.3±2.7 | 17.2±0.0 |
| 5      | 0        | 42.9±5.6 | 31.7±1.4 <sup>ab</sup> | 18.4±0.5 | 9.8±1.4 <sup>a</sup>  | 22.2±0.8 | 16.4±0.3 |
|        | 4        | 47.7±0.9 | 31.1±0.3 <sup>a</sup>  | 18.7±0.1 | 10.5±0.3 <sup>a</sup> | 21.5±2.1 | 16.8±0.1 |
|        | 7        | 48.6±0.9 | 31.7±1.5 <sup>ab</sup> | 18.7±0.1 | 10.4±0.6 <sup>a</sup> | 22.8±2.8 | 16.6±0.0 |

YB: yeast by-product powder; BP: *B. papyrifera*; Lp: *L. plantarum*; IT: incubation time; DM: dry matter; NDF: neutral detergent fiber; CP: crude protein; CF: crude fat; GE: Gross energy;

The data within a column with superscripts mean significant difference ( $P < 0.05$ ).

**Table S2.** Primers used in the present study.

| Gene           | Gene Bank ID                   | Nucleotide sequence of primers (5'-3')                   | Product size |
|----------------|--------------------------------|----------------------------------------------------------|--------------|
| AhR            | <a href="#">XM_015281254.2</a> | F: CGTCAGCTACACTGGGCATT<br>R: ATCGTTTCCCAGTATTGCAGGT     | 123          |
| Nrf2           | NM_205,117.1                   | F: TGTGTGTGATTCAACCCGACT<br>R: TTAATGGAAGCCGCACCACT      | 143          |
| IgA            | S40610.1                       | F: GTCACCGTCCACCTGGACTACA<br>R: ACCGATGGTCTCCTTCACATC    | 114          |
| TNF- $\alpha$  | HQ739087.1                     | F: GAGCGTTGACTTGGCTGTC<br>R: AAGCAACAACCAGCTATGCAC       | 129          |
| IL6            | NM_204628.1                    | F:CGTTTATGGAGAAGACCGTGAG<br>R:AGAGGATTGTGCCCCGAATAA      | 91           |
| Mucin2         | XM_421035                      | F: GCTGATTGTCACTCACGCCTT<br>R: ATCTGCCTGAATCACAGGTGC     | 442          |
| ZO-1           | XM_413773.4                    | F: TGTAGCCACAGCAAGAGGTG<br>R: CTGGAATGGCTCCTTGTGGT       | 159          |
| ZO-2           | NM_204918.1                    | F:GGATACAATTCAGCAACAGCAAGG<br>R: ACATGCGATCATCTGCGTCATCT | 89           |
| Occludin       | NM_205128.1                    | F: GCAGATGTCCAGCGGTTACTAC<br>R: CGAAGAAGCAGATGAGGCAGAG   | 176          |
| $\beta$ -actin | NM_205518.1                    | F: TTACTCGCCTCTGTGAAGGC<br>R: TCCTAGACTGTGGGGGACTG       | 228          |

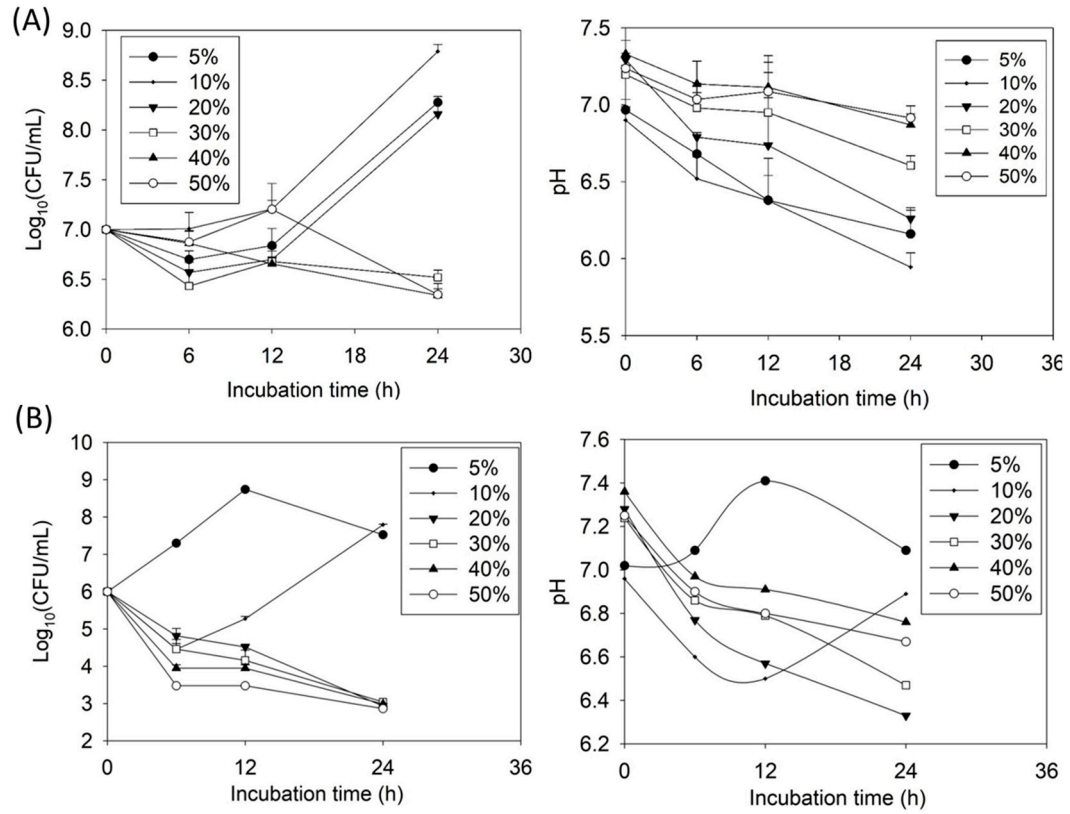

**Fig. S1.** Effects of incremental levels of yeast by-product supplementation on the growth and pH of the sterile solid-state Lp- (A) and Bv- (B) fermented *B. papyrifera*.

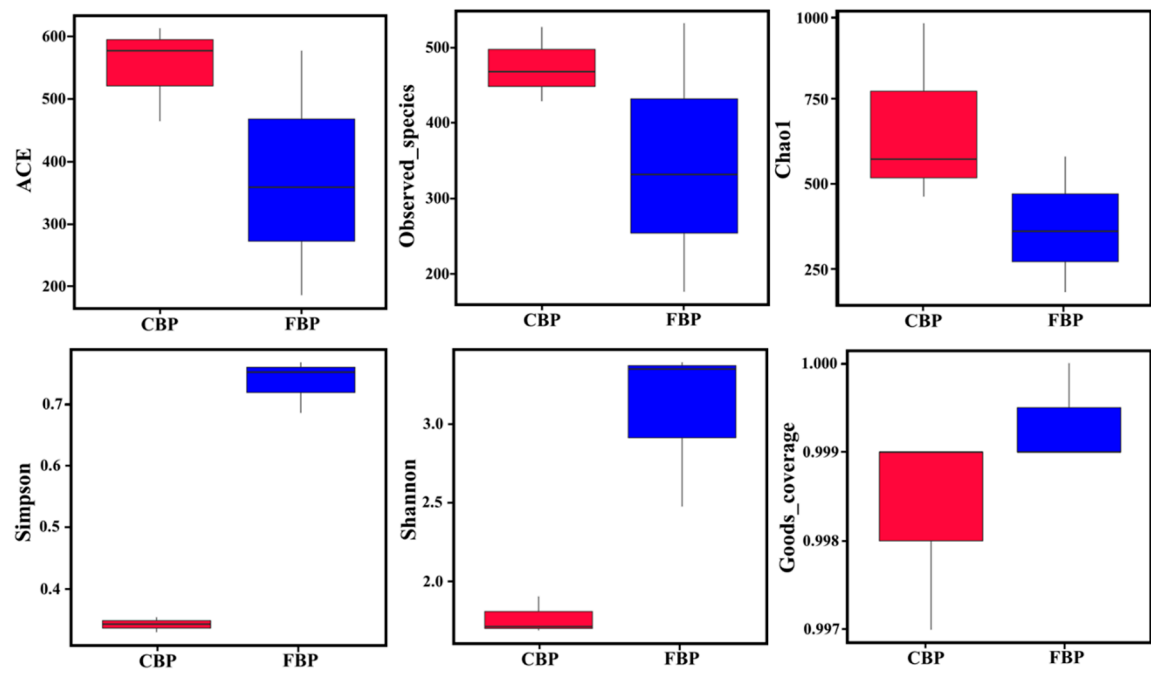

**Fig. S2.** Alpha diversity in raw (CBP) and Lp-fermented *B. papyrifera* product (FBP) under practical condition.

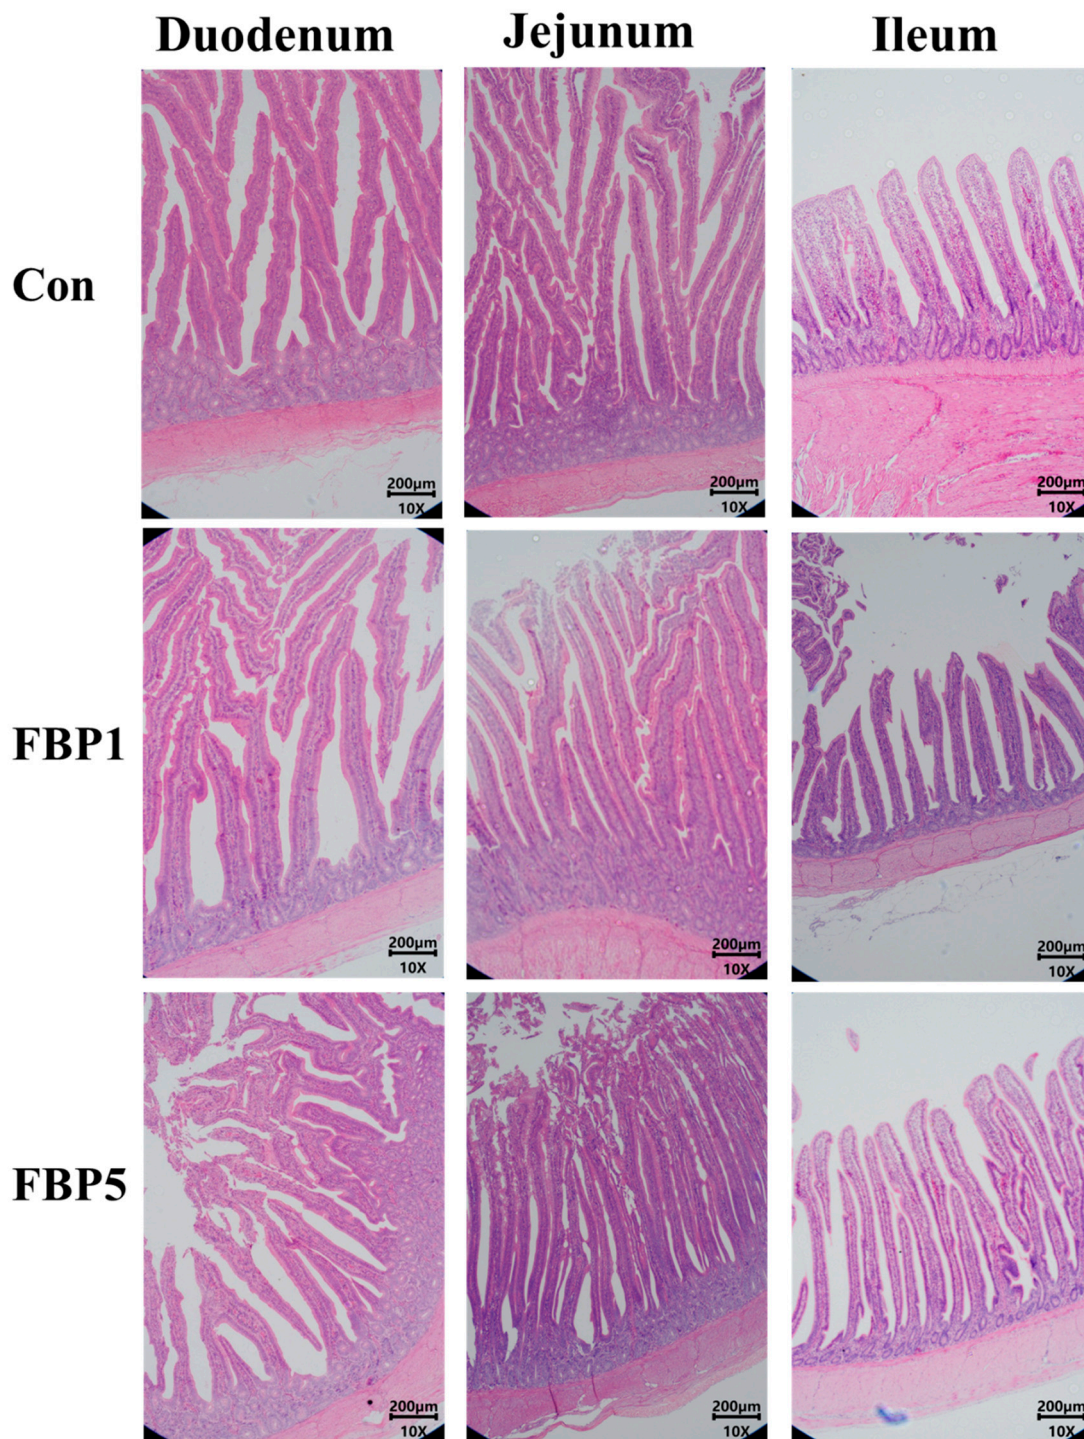

**Fig. S3.** Dietary effects of Lp-fermented *B. papyrifera* (FBP) on intestinal morphology of laying hens. Con: the hens fed with basal diet; FBP1, the hens fed with 1% (wt/wt) FBP product in basal diet; FBP5, the hens fed with 5% (wt/wt) FBP product in basal diet.

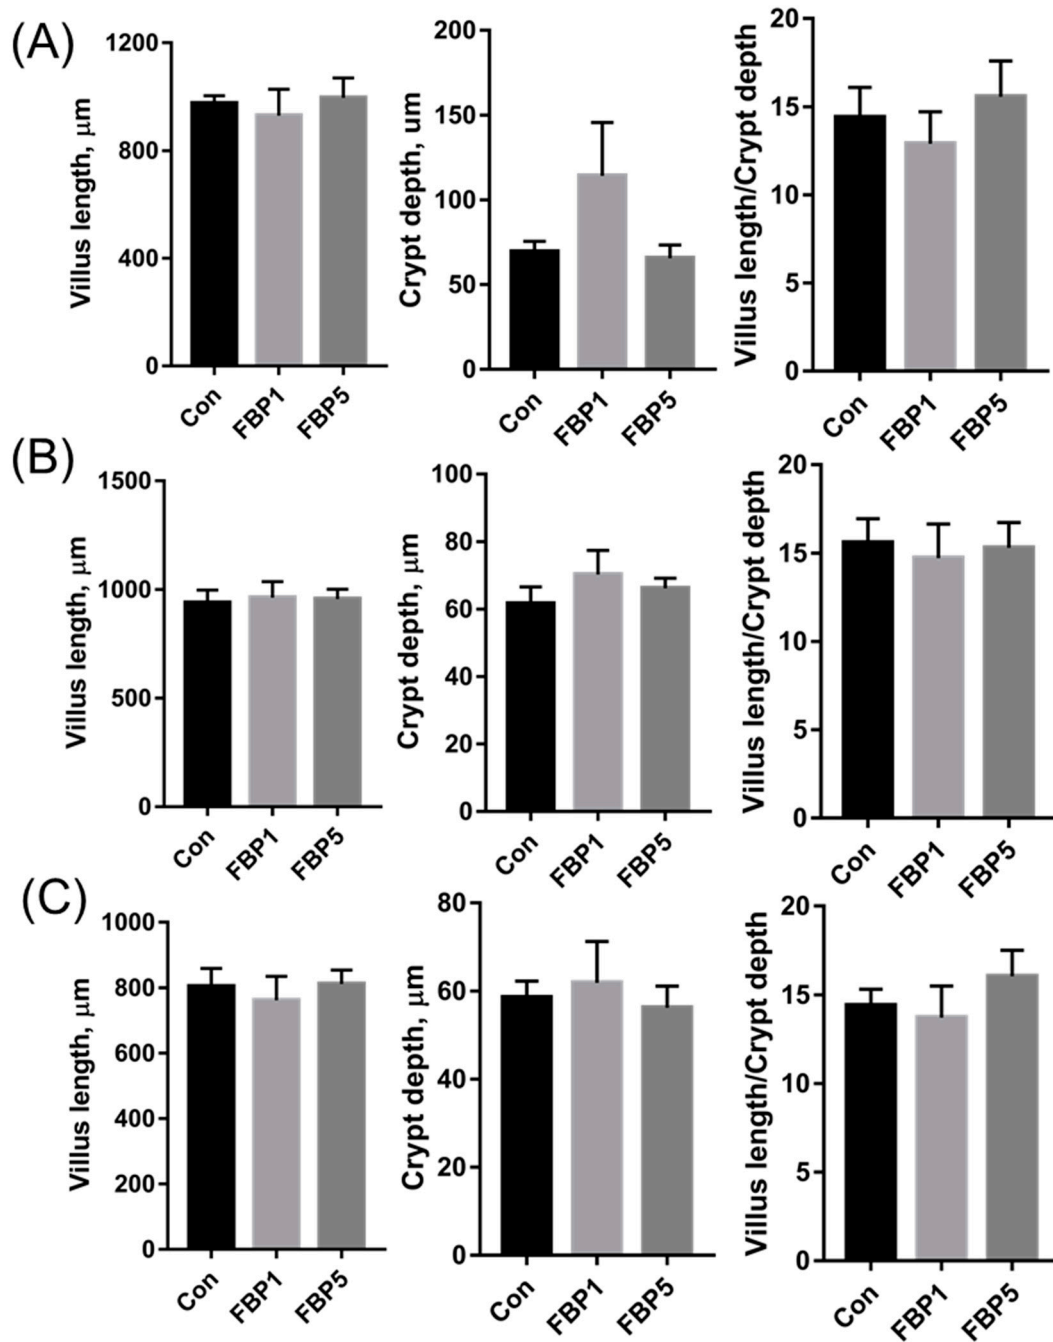

**Fig. S4.** Dietary effects of Lp-fermented *B. papyrifera* (FBP) product on villus length, crypt depth and villus length-to-crypt depth ratio of laying hens. Con: the hens fed with basal diet; FBP1, the hens fed with 1% (wt/wt) FBP product in basal diet; FBP5, the hens fed with 5% (wt/wt) FBP product in basal diet. (A) Duodenum; (B) Jejunum; (C) Ileum.
